# Supplementary material
Source: MDPI journal article supplement (https://www.mdpi.com/2308-3417/7/2/26)
Supplement: s1 [file s1]

## Supplementary Tables

*Supplementary Table S1: Diagnosis criteria of undernutrition*

| ASPEN Criteria           | ESPEN Criteria                                       | MNA Criteria                    |
|--------------------------|------------------------------------------------------|---------------------------------|
| Low energy intake        | BMI<18.5Kg/m <sup>2</sup> with weight loss           | *Reduced food intake            |
| Weight loss              | BMI<18.5Kg/m <sup>2</sup> with reduced fat-free mass | *Weight loss                    |
| Loss of muscle mass      |                                                      | *Presence of Acute disease      |
| Loss of subcutaneous fat |                                                      | *Mobility                       |
| Fluid accumulation       |                                                      | BMI (< 18.5 kg/m <sup>2</sup> ) |
| Hand grip strength       |                                                      | *Neuropsychological problems    |

\* Presence of symptoms during past 3 months

*Supplementary Table S2: Previous studies showing the different tools used and the key findings*

| Country/District  | Study Ref | Sample size | Prevalence of undernutrition | Year | Tool          |
|-------------------|-----------|-------------|------------------------------|------|---------------|
| Sri Lanka Colombo | [11]      | 452         | 20%                          | 2012 | Anthropometry |
| Sri Lanka Galle   | [30]      | 396         | 0.5%, at risk -30.8%         | 2017 | MNA           |
| Sri Lanka Kandy   | [12]      | 999         | 12.7%                        | 2017 | MNA           |
| Sri Lanka Mathale | [13]      | 3194        | 38.4%                        | 2002 | Anthropometry |
| Sri Lanka Mannar  | [14]      | 200         | 45%                          | 2007 | Anthropometry |
| India             | [26]      | 190         | 19.47 %                      | 2016 | MNA           |
| Nepal             | [27]      | 242         | 24%                          | 2017 | MNA           |
| France            | [28]      | 692         | Urban-7.4%<br>Rural-18.5%    | 2014 | MNA           |
| Turkey            | [29]      | 1030        | 16%                          | 2015 | MNA           |

*Supplementary Table S3: Criteria used to describe an older person as undernourished (overall)*

| Criteria               | Cut-off value for<br>undernutrition in men | Cut-off value for<br>undernutrition in women |
|------------------------|--------------------------------------------|----------------------------------------------|
| BMI                    | < 18.5 Kg.M <sup>2</sup>                   | < 18.5 Kg.M <sup>2</sup>                     |
| MUAC                   | ≤ 23.0 cm                                  | ≤ 22.0 cm                                    |
| Body fat percentage    | < 14.0 %                                   | < 26.0%                                      |
| Body muscle percentage | < 34.4%                                    | < 26.6%                                      |

*Supplementary Table S4: Comparison of key findings of the present study and previous studies*

| Key finding                                   | Present study                                                    | Previous studies                                                                                                                                                            |
|-----------------------------------------------|------------------------------------------------------------------|-----------------------------------------------------------------------------------------------------------------------------------------------------------------------------|
| <b>Prevalence of undernutrition</b>           | 35.3%                                                            | 20%-Colombo-Sri Lanka [11]<br><br>38.4% - Mathale-Sri Lanka [13]<br><br>19.5% in India [26]<br><br>24.0% in Nepal [27]<br><br>7.5% in France [28]<br><br>16% in Turkey [29] |
| <b>Factors associated with undernutrition</b> | Age ≥70 years -associated with low muscle mass and high fat mass | <b>Age ≥60 years</b><br><br>Galle-Sri Lanka [30]<br><br>Kandy district-Sri Lanka [12]<br><br><b>Age ≥70 years</b>                                                           |

|                                                                                 |                                     |
|---------------------------------------------------------------------------------|-------------------------------------|
|                                                                                 | Northwest Ethiopia [35]             |
|                                                                                 | France [28]                         |
| Presence of Diabetes Mellitus associated with low muscle mass and high fat mass | Associated with undernutrition [11] |
| Disability in chewing with high fat mass in women                               | Associated with tooth loss [36]     |

*Supplementary Table S5: Distribution of older men and women according to 4 categories of muscle mass and fat mass*

|                                    | % (95% CI) among older Women | % (95% CI) among older Men |
|------------------------------------|------------------------------|----------------------------|
|                                    | 555/800                      | 245/800                    |
| High fat mass and low muscle mass  | 4.3% (2.6-5.7)<br>N=24       | 15.1% (10.6-19.5)<br>N=37  |
| Low fat mass and low muscle mass   | 21.4% (17.7-24.8)<br>N=119   | 10.6% (6.9-14.6)<br>N=26   |
| High fat mass and high muscle mass | 70.6% (66.8-74.3)<br>N=392   | 11.8% (7.7-15.8)<br>N=29   |
| Low fat mass and high muscle mass  | 3.6% (2.0-5.1)<br>N=20       | 62.4% (56.3-68.4)<br>N=153 |
