# Supplementary material
Source: MDPI journal article supplement (https://www.mdpi.com/2308-3417/7/2/26)
Supplement: s1 [file s1]

## **Annex II**

### **Confidential**

#### **Undernutrition, dietary pattern, associated factors and effectiveness of a nutrition education intervention in improving undernutrition among elderly in Colombo District**

#### **Questionnaire**

DS Division:

Serial no.

GN Division:

Name of the elderly:

Address:

Date:

#### **Part one - Assessment of factors associated with Undernutrition**

##### **Part A- Socio-Demographic factors**

1. Date of birth Day..... Month..... year.....

Age in years .....

2. Sex

|          |  |
|----------|--|
| 1. Male  |  |
| 2.Female |  |

3. Ethnicity

|           |  |
|-----------|--|
| 1.Sinhala |  |
| 2.Tamil   |  |
| 3.Muslim  |  |
| 4.Burger  |  |
| 5.Other   |  |

4. Religion

|             |  |
|-------------|--|
| 1.Buddhist  |  |
| 2.Christian |  |
| 3.Hindu     |  |
| 4.Islam     |  |
| 5.other     |  |

5. Marital status

|                   |  |
|-------------------|--|
| 1.Married         |  |
| 2.Widowed         |  |
| 3.Divorced        |  |
| 4.Unmarried       |  |
| 5.Separated       |  |
| 6.Living together |  |

6. What is your living environment?

|                       |  |
|-----------------------|--|
| 1.Urban - Residential |  |
| 2.Urban – Slum        |  |
| 3.Rural               |  |
| 4.Estate              |  |

7. What is your highest educational achievement?

|                           |  |
|---------------------------|--|
| 1.No schooling            |  |
| 2.Grade 1-5               |  |
| 3.Grade 6-10              |  |
| 4.G.C.E O/L passed        |  |
| 5. G.C.E. A/L passed      |  |
| 6.Degree and Postgraduate |  |

8. What is your employment status?

|                      |  |
|----------------------|--|
| 1.Currently employed |  |
| 2.Retired            |  |
| 3.Never employed     |  |

9. What is your monthly income in rupees?

|                    |  |
|--------------------|--|
| 1.No income        |  |
| 2.< 5000           |  |
| 3.5000 – 10000     |  |
| 4.10,001 – 15, 000 |  |
| 5.>15, 000         |  |

10. What is your Source of income? (can mark more than one)

|                          |  |
|--------------------------|--|
| 1.Employment / pension   |  |
| 2.Assets / Bank accounts |  |
| 3.House rentals          |  |
| 3.Family members support |  |
| 4.Relatives support      |  |
| 5.Government assistance  |  |

11. How many others living with you & the relationship with you? Total.....

| Relationship |
|--------------|
| 1.           |
| 2.           |
| 3.           |
| 4.           |
| 5.           |
| 6.           |
| 7.           |
| 8.           |
| 9.           |
| 10.          |

12. Who is your primary care giver?

|                              |  |
|------------------------------|--|
| 1.husband/ wife              |  |
| 2.Son/Daughter               |  |
| 3.Son in law/Daughter in law |  |
| 4.Siblings                   |  |
| 5.Grand children             |  |
| 6.Relative                   |  |
| 7. Other                     |  |

13. Do you look after your grandchildren?

|       |  |
|-------|--|
| 1.Yes |  |
| 2.No  |  |

14. What is your level of satisfaction on family support?

|                  |  |
|------------------|--|
| 1.Very satisfied |  |
| 2.Satisfied      |  |
| 3.Dissatisfied   |  |

## **Part B- Factors associated with Health status and Disabilities**

15. Are you suffering from following chronic medical conditions?

|                     |  |
|---------------------|--|
| 1.Diabetes Mellitus |  |
| 2.Hypertension      |  |
| 3.Heart diseases    |  |
| 4.Renal failure     |  |
| 5.Asthma/COPD       |  |
| 6.Convulsions       |  |
| 7.Any other         |  |

16. Were you hospitalized during the past 3 months?

|       |  |
|-------|--|
| 1.Yes |  |
| 2.No  |  |

17. If yes, duration of hospitalization.....

18. Where do you go to seek treatment? (Mark the most frequently visited place)

|                                       |  |
|---------------------------------------|--|
| 1.Government – western Institution    |  |
| 2.Government – indigenous Institution |  |
| 3.Private – western institution       |  |
| 4.Private – indigenous institution    |  |
| 5.Spiritual/ religious activities     |  |
| 6.Other                               |  |

19. How many drugs do you use for co- morbidities per day?.....

20. Are you having food allergies?

|       |  |
|-------|--|
| 1.Yes |  |
| 2.No  |  |

21. Are you having disabilities?

|       |  |
|-------|--|
| 1.Yes |  |
| 2.No  |  |

22. What are the physical disabilities you are having and mark whether you are using disability aids?

| Physical disability        | Present or not |
|----------------------------|----------------|
| 1.Hearing                  |                |
| 2.Smell                    |                |
| 3.Taste                    |                |
| 4.vision                   |                |
| 5.Chewing                  |                |
| 6.Musculoskeletal problems |                |
| 7.Any other                |                |

23. What are the Psychological disabilities you are having and mark whether you are taking treatment?

| Psychological disability | Present or not |
|--------------------------|----------------|
| 1.Depression             |                |
| 2.Schizophrenia          |                |
| 3.Any other              |                |

### **Part C – Factors associated with behaviors**

24. Do you currently smoke?

|       |  |
|-------|--|
| 1.Yes |  |
| 2.No  |  |

25. Are you currently using alcohol?

|       |  |
|-------|--|
| 1.Yes |  |
| 2.No  |  |

26. If yes, what is the type and amount (per week) of alcohol you are consuming?

| Type of alcohol |  | Amount |
|-----------------|--|--------|
| 1.Arrack        |  |        |
| 2.Beer          |  |        |
| 3.Kasippu       |  |        |
| 4.Other         |  |        |

27. Are you chewing betel?

|     |  |
|-----|--|
| Yes |  |
| No  |  |

28. If yes, what is the frequency per day?.....

### **Part Two – Assessment of factors associated with dietary pattern**

29. How much of responsibility do you have for the following?

|                   | Little or none | Average | Most or all |
|-------------------|----------------|---------|-------------|
| 1.Food shopping   |                |         |             |
| 2.Planning meals  |                |         |             |
| 3.Preparing meals |                |         |             |

30. In a typical week, where are your meals prepared mostly?

|             | At home | Out | Do not eat meals |
|-------------|---------|-----|------------------|
| 1.Breakfast |         |     |                  |
| 2.Lunch     |         |     |                  |
| 3.Dinner    |         |     |                  |

31. Do you skip meals?

|       |  |
|-------|--|
| 1.Yes |  |
| 2.no  |  |

32. How do you receive nutritional advises? (Can give more than one response)

|                         |  |
|-------------------------|--|
| 1.Not receiving         |  |
| 2.General practitioner  |  |
| 3.Hospital              |  |
| 4.Public Health Midwife |  |
| 5.Others specify....    |  |

33. Availability of a home garden?

|       |  |
|-------|--|
| 1.Yes |  |
| 2.No  |  |

**Part Three – Assessment of the dietary pattern**

**24 hour dietary recall sheet**

| <b>MEAL</b>            | <b>Items consumed</b> | <b>Amount</b> |
|------------------------|-----------------------|---------------|
| <b>Break fast</b>      |                       |               |
|                        |                       |               |
|                        |                       |               |
|                        |                       |               |
|                        |                       |               |
|                        |                       |               |
|                        |                       |               |
|                        |                       |               |
|                        |                       |               |
|                        |                       |               |
| <b>Morning snack</b>   |                       |               |
|                        |                       |               |
|                        |                       |               |
|                        |                       |               |
|                        |                       |               |
| <b>Lunch</b>           |                       |               |
|                        |                       |               |
|                        |                       |               |
|                        |                       |               |
|                        |                       |               |
|                        |                       |               |
|                        |                       |               |
|                        |                       |               |
|                        |                       |               |
|                        |                       |               |
| <b>Afternoon snack</b> |                       |               |
|                        |                       |               |
|                        |                       |               |
|                        |                       |               |

|               |  |  |
|---------------|--|--|
|               |  |  |
|               |  |  |
| <b>Dinner</b> |  |  |
|               |  |  |
|               |  |  |
|               |  |  |
|               |  |  |
|               |  |  |
|               |  |  |
| <b>Other</b>  |  |  |
|               |  |  |
|               |  |  |
|               |  |  |

#### **Part Four- Assessment of nutritional status**

##### **Anthropometric measurements and Body composition measurements**

|                                    | <b>First time</b> | <b>second time</b> | <b>Average</b> |
|------------------------------------|-------------------|--------------------|----------------|
| <b>Weight</b>                      |                   |                    |                |
| <b>Height</b>                      |                   |                    |                |
| <b>Arm span length</b>             |                   |                    |                |
| <b>Mid upper arm circumference</b> |                   |                    |                |
| <b>Body fat percentage</b>         |                   |                    |                |
| <b>Body muscle percentage</b>      |                   |                    |                |
